# Supplementary material
Source: Springer Nature journal article supplement (https://www.springermedizin.de/resource/supplementary/12874_2010_628_MOESM1_ESM.pdf/9432274)

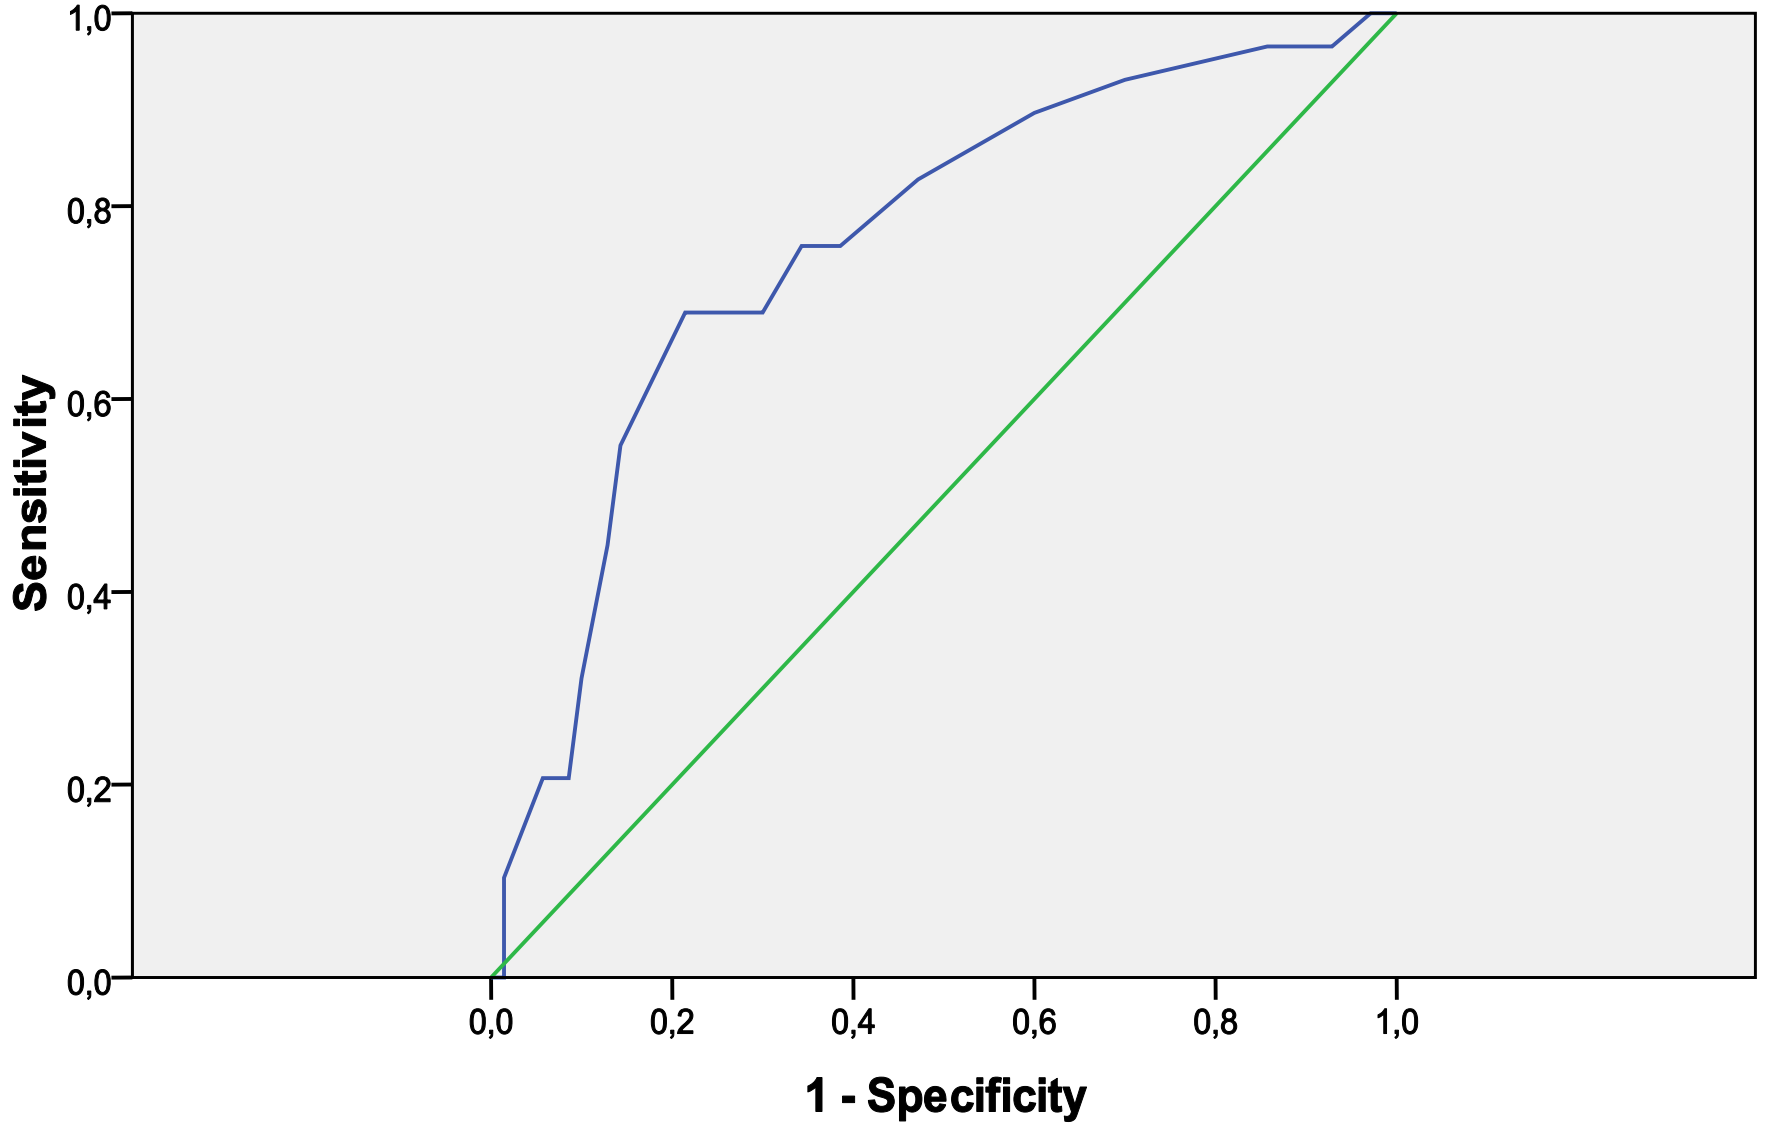

Diagonal segments are produced by ties.

Supplement: MOESM1 [file 9432274]
